# Supplementary material for: Regions of Chromosome 2A of Bread Wheat (Triticum aestivum L.) Associated with Variation in Physiological and Agronomical Traits under Contrasting Water Regimes
Source: MDPI journal article supplement (doi:10.3390/plants10051023), 2021-05-20
Supplement: s1 [file s1]

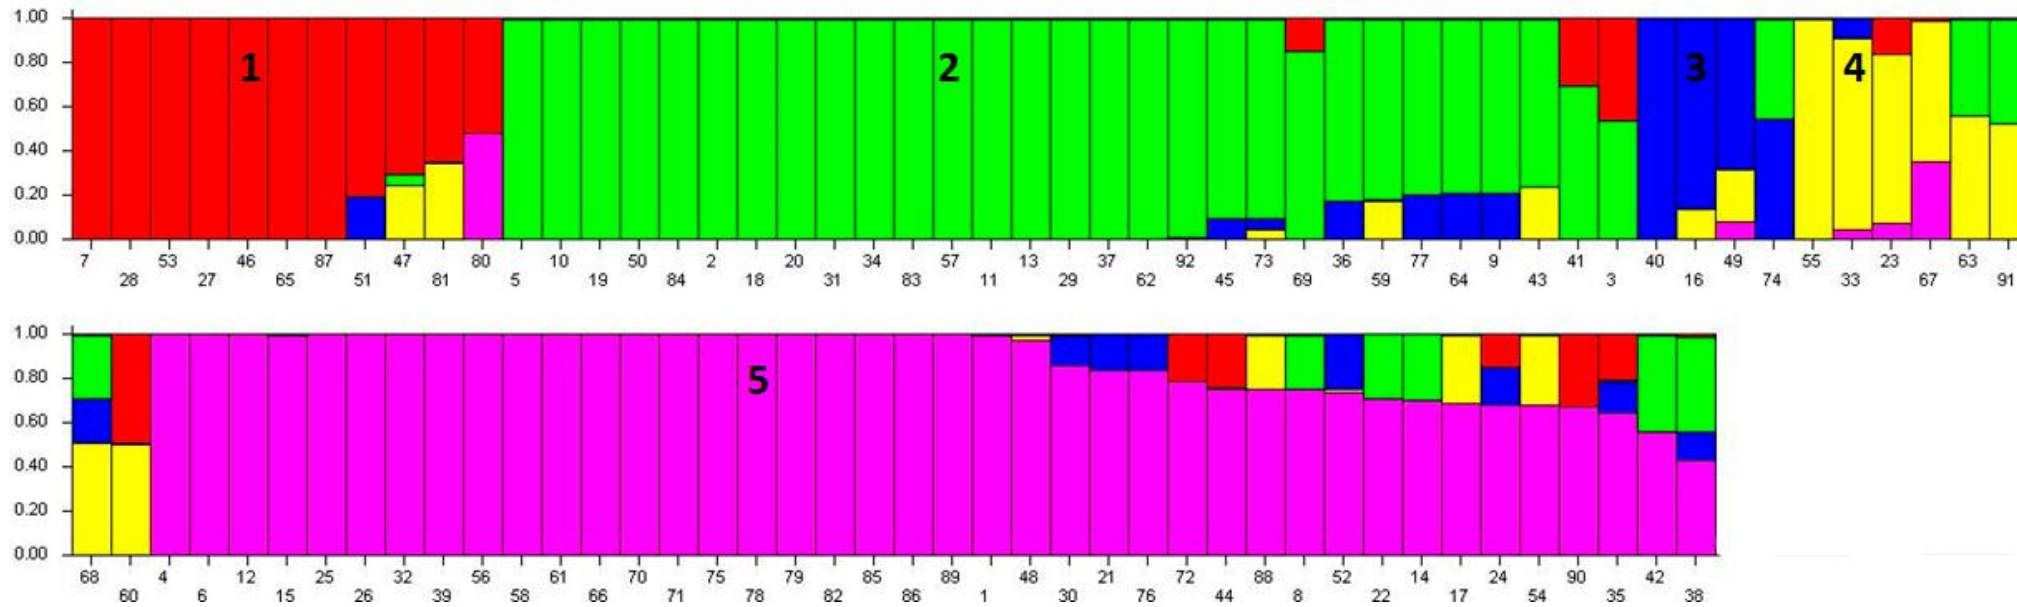

**Figure S3.** The genetic structure of 92 SCRDH lines S29 (YP 2A) based on 146 SNPs. Each SCRDH line is represented by a single vertical line that is partitioned into Q colored segments (Q = 5) in the x-axis (Q matrix). The y-axis illustrated the Q-value.
