# Supplementary material for: Regions of Chromosome 2A of Bread Wheat (Triticum aestivum L.) Associated with Variation in Physiological and Agronomical Traits under Contrasting Water Regimes
Source: MDPI journal article supplement (doi:10.3390/plants10051023), 2021-05-20
Supplement: s1 [file s1]

**Table S2.** Tolerance indices of the C29 (YP 2A) SCRDH lines and their parents.

| Traits         | Parents |     | SCRDH lines      |        |         |
|----------------|---------|-----|------------------|--------|---------|
|                | S29     | YP  | Average $\pm$ SD | Limits | max/min |
| DT             | 107     | 109 | 115 $\pm$ 10     | 91-141 | 1.6     |
| DF             | 91      | 101 | 103 $\pm$ 4      | 91-112 | 1.2     |
| DWR            | 114     | 107 | 101 $\pm$ 7      | 84-117 | 1.4     |
| StL            | 100     | 102 | 94 $\pm$ 4       | 86-104 | 1.2     |
| PL             | 96      | 101 | 95 $\pm$ 6       | 86-131 | 1.5     |
| NT             | 82      | 90  | 92 $\pm$ 19      | 77-157 | 2.0     |
| SL             | 104     | 103 | 100 $\pm$ 6      | 86-115 | 1.3     |
| SpkN           | 109     | 110 | 102 $\pm$ 5      | 85-114 | 1.3     |
| GNmain         | 99      | 114 | 98 $\pm$ 11      | 72-141 | 2.0     |
| GWmain         | 83      | 84  | 70 $\pm$ 11      | 50-115 | 2.3     |
| Fert           | 91      | 104 | 97 $\pm$ 11      | 75-135 | 1.8     |
| GNsecond       | 68      | 75  | 55 $\pm$ 13      | 25-105 | 4.2     |
| GWsecond       | 59      | 51  | 36 $\pm$ 10      | 17-71  | 4.2     |
| GNtotal        | 78      | 88  | 64 $\pm$ 12      | 39-114 | 2.9     |
| GWtotal        | 69      | 64  | 44 $\pm$ 10      | 26-78  | 3.0     |
| TGW            | 85      | 73  | 72 $\pm$ 11      | 52-103 | 2.0     |
| SW             | 52      | 57  | 62 $\pm$ 8       | 46-88  | 1.9     |
| E              | 68      | 144 | 157 $\pm$ 133    | 18-710 | 39.4    |
| Gs             | 66      | 143 | 164 $\pm$ 149    | 16-795 | 49.7    |
| A              | 84      | 115 | 142 $\pm$ 90     | 44-566 | 12.9    |
| WUE            | 123     | 69  | 113 $\pm$ 51     | 40-306 | 7.7     |
| F <sub>0</sub> | 84      | 98  | 82 $\pm$ 16      | 47-121 | 2.6     |
| Fv/Fm          | 103     | 102 | 108 $\pm$ 11     | 92-153 | 1.7     |
| Y(II)          | 102     | 97  | 110 $\pm$ 18     | 82-208 | 2.5     |
| ETR            | 102     | 97  | 110 $\pm$ 18     | 82-211 | 2.6     |
| NPQ            | 113     | 84  | 108 $\pm$ 49     | 35-244 | 7.0     |
| ChlA           | 111     | 99  | 123 $\pm$ 29     | 70-232 | 3.3     |
| ChlB           | 105     | 101 | 118 $\pm$ 25     | 73-194 | 2.7     |
| ChlA+B         | 109     | 100 | 121 $\pm$ 26     | 71-208 | 2.9     |
| Car            | 107     | 95  | 110 $\pm$ 24     | 65-184 | 2.8     |
| ChlA+B/Car     | 107     | 107 | 111 $\pm$ 15     | 84-144 | 1.7     |
| SOD            | 101     | 111 | 106 $\pm$ 16     | 73-152 | 2.1     |
| APX            | 107     | 77  | 110-44           | 40-324 | 8.1     |
| DHAR           | 49      | 49  | 125 $\pm$ 58     | 37-354 | 9.6     |
| GR             | 150     | 185 | 131 $\pm$ 60     | 15-346 | 23.1    |
| CAT            | 88      | 100 | 107 $\pm$ 44     | 38-257 | 6.6     |
| LOX            | 131     | 153 | 164 $\pm$ 93     | 30-457 | 15.2    |
| GC             | 99      | 93  | 108 $\pm$ 8      | 83-131 | 1.6     |

Abbreviations as in Table S1.
