# Supplementary material for: Regions of Chromosome 2A of Bread Wheat (Triticum aestivum L.) Associated with Variation in Physiological and Agronomical Traits under Contrasting Water Regimes
Source: MDPI journal article supplement (doi:10.3390/plants10051023), 2021-05-20
Supplement: s1 [file s1]

**Table S1.** Broad-sense heritability and average meanings of phenotypic traits in the S29 (YP 2A) SCRDH lines and their parents under two water regimes.

| Traits          | Parents |         | Recombinant lines |            |         |                |
|-----------------|---------|---------|-------------------|------------|---------|----------------|
|                 | S29     | YP      | Average±SD        | Limits     | max/min | H <sup>2</sup> |
| Normal watering |         |         |                   |            |         |                |
| DT              | 23.9    | 21.3*   | 19.0±0.9          | 17.5-23.2  | 1.3     | 0.25           |
| DF              | 43.5    | 46.5**  | 41.2±1.1          | 38.9-44.7  | 1.2     | 0.56           |
| DWR             | 68.5    | 73.0*   | 66.2±2.1          | 57.9-71.6  | 1.2     | 0.48           |
| StL             | 86.2    | 72.8*   | 87.8±3.6          | 76.5-96.3  | 1.3     | 0.23           |
| PL              | 37.7    | 32.3**  | 37.4±1.9          | 31.1-41.2  | 1.3     | 0.44           |
| NT              | 3.4     | 3.0     | 4.4±0.5           | 3.2-5.6    | 1.8     | 0.05           |
| SL              | 7.1     | 9.0***  | 7.5±0.4           | 6.4-8.3    | 1.3     | -              |
| SpkN            | 13.0    | 17.3*** | 13.8±0.6          | 12.4-15.1  | 1.2     | 0.15           |
| GNmain          | 25.3    | 29.3    | 28.8±2.3          | 22.3-33.6  | 1.5     | 0.15           |
| GWmain          | 1.0     | 1.1     | 1.1±0.1           | 0.9-1.5    | 1.7     | 0.17           |
| Fert            | 1.9     | 1.7     | 1.5±0.1           | 0.87-1.73  | 2.0     | 0.10           |
| GNsecond        | 57.8    | 65.3    | 97.9±16.7         | 62.2-139.1 | 2.2     | 0.13           |
| GWsecond        | 1.8     | 2.1     | 3.4±0.7           | 2.0-5.0    | 2.5     | 0.16           |
| GNtotal         | 83.0    | 94.6    | 113.5±17.7        | 73.3-154.6 | 2.1     | 0.13           |
| GWtotal         | 2.8     | 3.1     | 4.6±0.8           | 2.9-6.4    | 2.2     | 0.16           |
| TGW             | 39.5    | 36.0    | 39.4±2.4          | 32.8-44.5  | 1.4     | 0.20           |
| SW              | 5.0     | 6.2***  | 4.4±0.5           | 3.5-5.8    | 1.7     | 0.31           |
| E               | 0.39    | 0.38    | 0.5±0.3           | 0.1-1.2    | 12.1    | 0.59           |
| Gs              | 27.3    | 27.1    | 38.6±20.4         | 6.4-94.0   | 14.6    | 0.59           |
| A               | 2.0     | 2.0     | 2.3±0.8           | 0.6-4.2    | 6.7     | 0.68           |
| WUE             | 5.7     | 6.7     | 5.2±1.3           | 2.7-8.5    | 3.2     | 0.34           |
| F <sub>0</sub>  | 93.0    | 87.0    | 95.3±20.5         | 63.3-184.3 | 2.9     | 0.61           |
| Fv/Fm           | 0.8     | 0.8     | 0.7±0.1           | 0.5-0.9    | 1.7     | 0.82           |
| Y(II)           | 0.5     | 0.5     | 0.5±0.1           | 0.3-0.6    | 2.4     | 0.61           |
| ETR             | 34.9    | 34.7    | 33.0±4.2          | 16.3-39.8  | 2.4     | 0.61           |
| NPQ             | 0.3     | 0.5     | 0.4±0.1           | 0.2-0.6    | 3.3     | 0.31           |
| ChlA            | 2.0     | 1.98    | 1.9±0.3           | 1.0-2.9    | 2.8     | 0.54           |
| ChlB            | 1.0     | 1.0     | 0.9±0.2           | 0.59-1.27  | 2.2     | 0.46           |
| ChlA+B          | 3.1     | 2.8     | 2.8±0.1           | 1.7-4.1    | 2.4     | 0.54           |
| Car             | 0.43    | 0.39*   | 0.4±0.1           | 0.3-0.6    | 2.2     | 0.50           |
| ChlA+B/Car      | 7.6     | 7.3     | 7.1±0.8           | 5.7-9.8    | 1.7     | 0.38           |
| SOD             | 49.8    | 45.5    | 49.4±6.7          | 29.5-98.6  | 3.3     | 0.18           |
| APX             | 1.64    | 1.94**  | 1.7±0.4           | 0.8-2.8    | 3.3     | 0.47           |
| DHAR            | 1.41    | 1.33    | 1.1±0.4           | 0.4-2.2    | 5.6     | 0.44           |
| GR              | 0.21    | 0.17    | 0.2±0.1           | 0.1-0.8    | 9.5     | 0.35           |
| CAT             | 0.16    | 0.13    | 0.1±0.0           | 0.1-0.3    | 6.0     | 0.43           |
| LOX             | 16.4    | 11.0**  | 12.5±5.6          | 4.0-30.3   | 7.5     | 0.66           |

|                |      |         |           |            |      |      |
|----------------|------|---------|-----------|------------|------|------|
| GC             | 38.5 | 34.5    | 35.3±2.1  | 31.0-39.8  | 1.28 | -    |
| Drought        |      |         |           |            |      |      |
| DT             | 19.8 | 18.5    | 21.6±1.4  | 18.1-25.3  | 1.4  | 0.40 |
| DF             | 43.8 | 47.8**  | 41.2±1.3  | 38.5-44.0  | 1.1  | 0.55 |
| DWR            | 70.8 | 73.2*   | 65.9±3.2  | 58.7-72.4  | 1.2  | 0.38 |
| StL            | 85.8 | 76.4*   | 83.2±3.5  | 75.4-91.8  | 1.2  | 0.15 |
| PL             | 36.6 | 32.3*   | 35.7±2.2  | 29.3-47.1  | 1.6  | 0.20 |
| NT             | 2.8  | 2.6     | 4.0±0.4   | 3.1-5.4    | 1.7  | 0.19 |
| SL             | 7.4  | 9.2***  | 7.4±0.3   | 6.6-8.3    | 1.3  | 0.16 |
| SpkN           | 14.1 | 18.6*** | 13.9±0.7  | 12.5-15.5  | 1.2  | 0.22 |
| GNmain         | 25.3 | 33.3*   | 28.1±2.2  | 23.0-33.0  | 1.4  | 0.13 |
| GWmain         | 0.82 | 0.87    | 0.8±0.1   | 0.6-1.1    | 1.9  | 0.23 |
| Fert           | 1.8  | 1.9     | 2.0±0.2   | 1.6-2.4    | 1.5  | 0.09 |
| GNsecond       | 39.5 | 49.0    | 52.1±10.6 | 22.9-75.3  | 3.3  | 0.23 |
| GWsecond       | 1.0  | 0.9     | 1.2±0.3   | 0.6-2.7    | 4.2  | 0.23 |
| GNtotal        | 64.8 | 76.9    | 79.7±12.9 | 32.5-108.3 | 3.3  | 0.20 |
| GWtotal        | 1.8  | 1.8     | 2.0±0.3   | 1.5-3.3    | 2.2  | 0.29 |
| TGW            | 32.8 | 26.3**  | 28.1±4.2  | 21.3-38.7  | 1.8  | 0.57 |
| SW             | 2.7  | 3.2***  | 2.7±0.3   | 2.2-3.6    | 1.6  | 0.50 |
| E              | 0.6  | 0.55    | 0.6±0.3   | 0.1-1.4    | 9.9  | 0.62 |
| Gs             | 39.6 | 38.9    | 45.4±20.1 | 10.1-108.0 | 10.7 | 0.61 |
| A              | 2.6  | 2.28    | 2.8±0.7   | 1.1-4.6    | 4.2  | 0.67 |
| WUE            | 5.6  | 4.6     | 5.5±2.0   | 2.3-11.9   | 5.2  | 0.62 |
| F <sub>0</sub> | 78.5 | 84.8    | 75.6±9.2  | 57.3-105.2 | 1.8  | 0.51 |
| Fv/Fm          | 0.8  | 0.8     | 0.8±0.0   | 0.75-0.81  | 1.1  | 0.47 |
| Y(II)          | 0.5  | 0.5     | 0.5±0.0   | 0.5-0.6    | 1.3  | 0.20 |
| ETR            | 35.6 | 33.7    | 35.6±1.8  | 30.1-39.3  | 1.3  | 0.20 |
| NPQ            | 0.4  | 0.4     | 0.4±0.1   | 0.2-0.7    | 3.5  | 0.57 |
| ChlA           | 2.3  | 1.8***  | 2.2±0.3   | 1.3-3.2.6  | 2.5  | 0.42 |
| ChlB           | 1.09 | 0.98    | 1.0±0.2   | 0.7-1.4    | 2.0  | 0.61 |
| ChlA+B         | 3.4  | 2.8**   | 3.3±0.5   | 2.0-4.5    | 2.0  | 0.45 |
| Car            | 0.46 | 0.37**  | 0.4±0.1   | 0.2-0.6    | 2.6  | 0.51 |
| ChlA+B/Car     | 8.1  | 8.0     | 7.8±0.9   | 6.2-11.5   | 1.9  | 0.65 |
| SOD            | 50.5 | 50.1    | 51.8±6.0  | 32.8-72.7  | 2.2  | 0.15 |
| APX            | 1.66 | 1.41*   | 1.7±0.5   | 0.9-4.1    | 4.6  | 0.59 |
| DHAR           | 0.71 | 0.61    | 1.2±0.4   | 0.5-2.3    | 4.6  | 0.39 |
| GR             | 0.30 | 0.31    | 0.3±0.1   | 0.1-0.7    | 7.3  | 0.25 |
| CAT            | 0.14 | 0.13    | 0.1±0.1   | 0.1-0.4    | 6.7  | 0.26 |
| LOX            | 21.6 | 16.9**  | 17.1±6.5  | 4.7-33.3   | 7.1  | 0.63 |
| GC             | 39.0 | 37.0    | 37.9±2.7  | 30.5-41.8  | 1.38 | -    |

\*, \*\*, \*\*\* means differed significantly at P<0.05, 0.01, and 0.001, respectively.

Physiological and biochemical traits: A: photosynthetic rate ( $\mu\text{mol m}^{-2} \text{s}^{-1}$ ); Car: carotenoids; ChlA,B: chlorophyll A,B (mg/g of dry leaf weight); E: transpiration rate ( $\text{mmol m}^{-2} \text{s}^{-1}$ ); WUE: water use efficiency as net photosynthesis/transpiration; ETR: maximum electron transport rate ( $\text{photon m}^{-2} \text{sec}^{-1}$ ); F0: basic chlorophyll fluorescence yield; Fv/Fm: maximum quantum yield of PSII photochemistry; NPQ: non-photochemical quenching; Gs: stomatal conductance ( $\text{mol m}^{-2} \text{s}^{-1}$ ); SW: fresh weight of the main shoot (g); Y(II): effective photochemical quantum yield of photosystem II; CAT, DHAR, GR, SOD, LOX: activity of catalase, dehydroascorbate reductase, glutathione reductase, superoxide dismutase and lipoxygenase (U/mg protein).

Agronomical traits: DF: days to flowering; DT: days to tillering; DWR: days to wax ripening; StL: stem length (cm); PL: peduncle length (cm); NT: number of tillers; Fert: fertility; GNmain: grain number in the main spike; GNsecond: grain number in the secondary spikes; GWmain: grain weight in the main spike (g); GWsecond: grain weight in the secondary spikes (g); GNtotal: total grain number from the plant (g); GWtotal: total grain weight from the plant (g); SpL: spike length (cm); SpkN: spikelets number in the main spike; StL: stem length (cm); TGW: 1,000-grain weight of the main spike (g); GC: wet gluten content in grain (%).
